# Supplementary material
Source: publisher figshare collection journal article supplement (https://microbiology.figshare.com/articles/dataset/_/24570964)
Supplement: Supplementary file 1 [file 1]

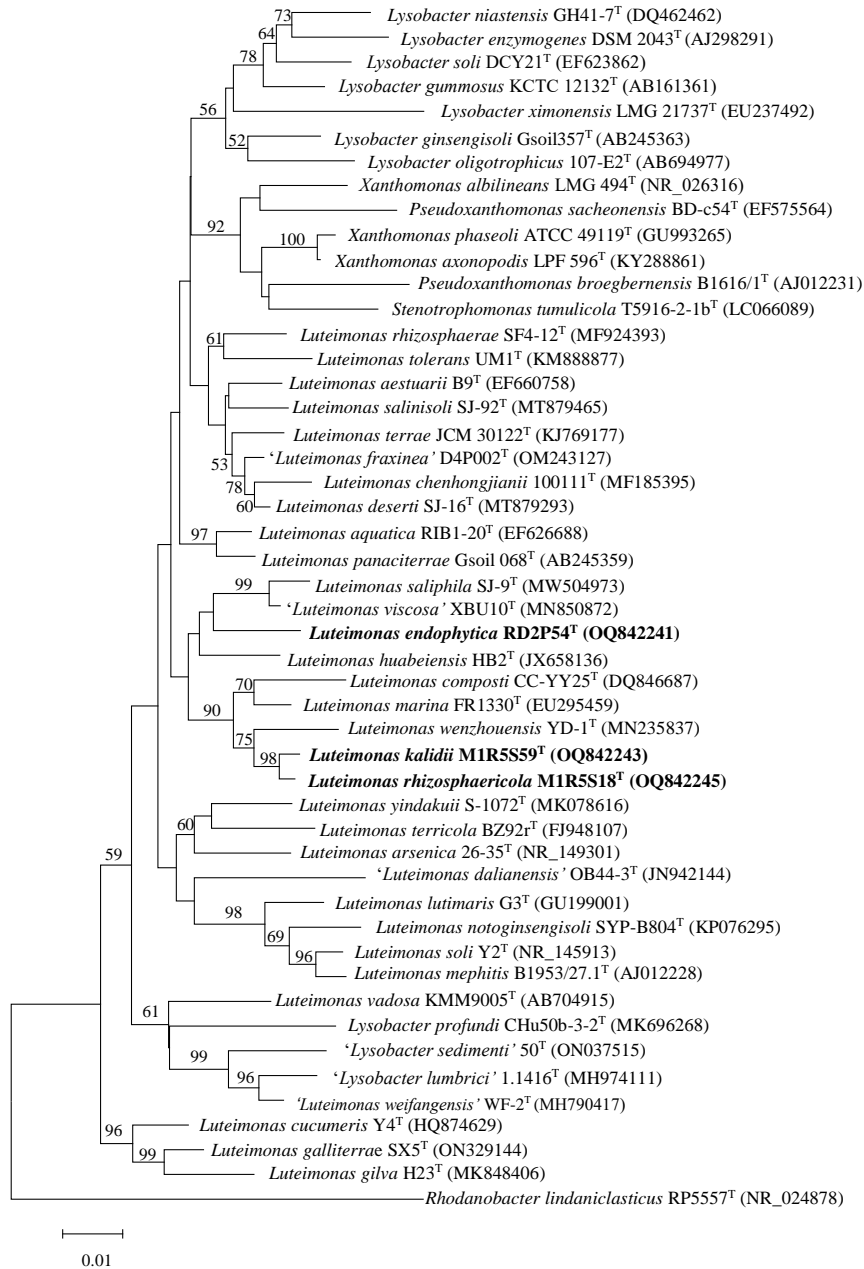

**Fig. S1** Phylogenetic tree reconstructed by minimum-evolution (ME) method based on 16S rRNA gene sequences. Bootstrap values >50% are shown at branch points. Bar, 0.005 substitutions per nucleotide position.
