# Supplementary material
Source: publisher figshare collection journal article supplement (https://microbiology.figshare.com/articles/dataset/_/24570964)
Supplement: Supplementary file 2 [file 1]

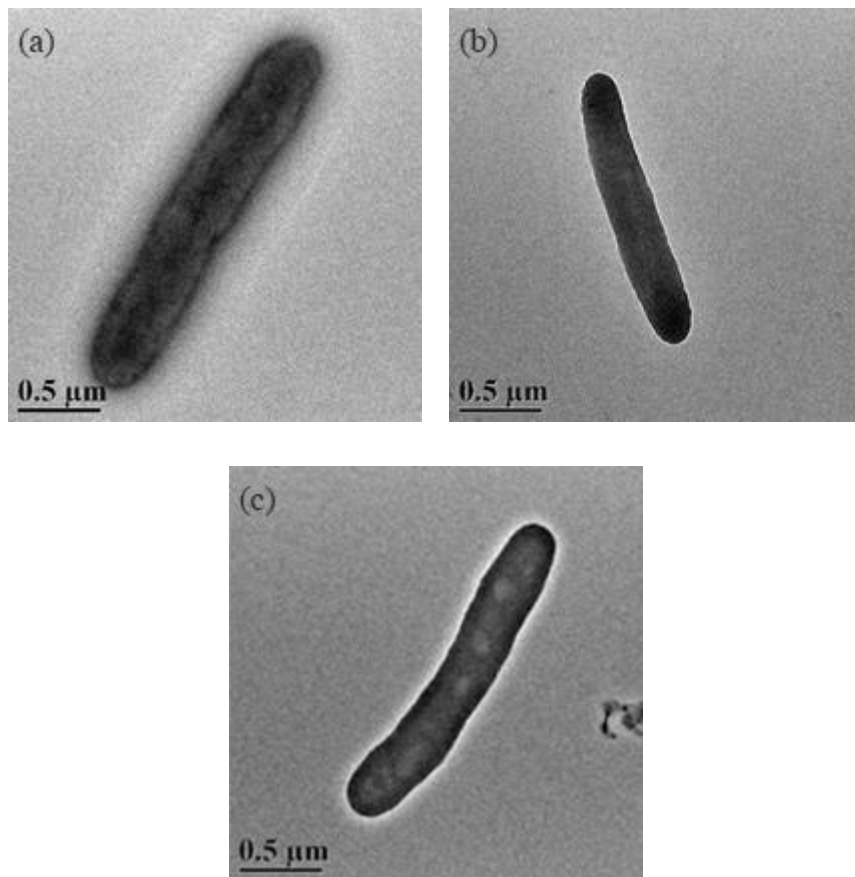

**Fig. S4** Transmission electron micrograph of a cell of strain RD2P54<sup>T</sup> (a), M1R5S18<sup>T</sup> (b), and M1R5S59<sup>T</sup> (c) grown on LB medium for 2 days at 30 °C. Bar, 0.5 μm.
