# Supplementary material
Source: publisher figshare collection journal article supplement (https://microbiology.figshare.com/articles/dataset/_/24570964)
Supplement: Supplementary file 3 [file 1]

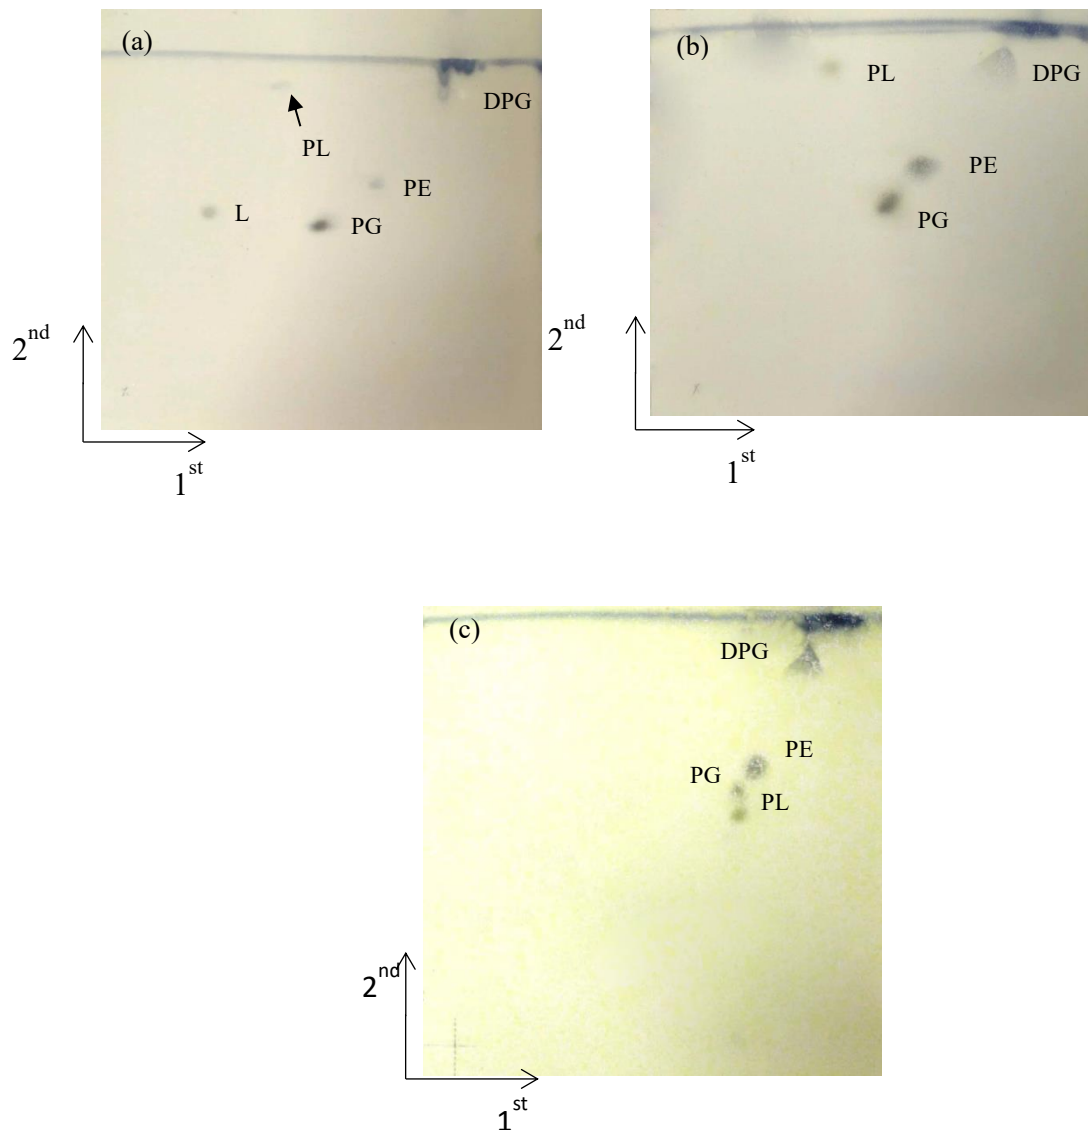

**Fig. S5** The major polar lipids of strains RD2P54<sup>T</sup>(a), M1R5S18<sup>T</sup>(b), and M1R5S59<sup>T</sup>(c) separating by two-dimensional TLC and spraying with molybdenum blue. The spots were checked by spraying with ninhydrin (for detection of aminolipids) and ammonium molybdate (for detection of phospholipids). 1<sup>st</sup> first dimensional TLC, 2<sup>nd</sup> second dimensional TLC. DPG, diphosphatidylglycerol; PG, phosphatidylglycerol; PE, phosphatidylethanolamine; L, unidentified lipid; PL, unidentified phospholipid.
