# Supplementary material
Source: publisher figshare collection journal article supplement (https://microbiology.figshare.com/articles/dataset/_/24570964)
Supplement: Supplementary file 4 [file 1]

**Table S1** Genome related information of strains RD2P54<sup>T</sup>, M1R5S18<sup>T</sup>, and M1R5S59<sup>T</sup>

| No. | Strains              | Total reads after filtering (Mb) | Average length of reads (bp) | Total base after filtering (Gb) | Completeness (%) | Contamination (%) | Assembly size (bp) | Contigs | G+C (%) | CDS   |
|-----|----------------------|----------------------------------|------------------------------|---------------------------------|------------------|-------------------|--------------------|---------|---------|-------|
| 1   | RD2P54 <sup>T</sup>  | 9.64                             | 149                          | 1.45                            | 99.59            | 1.38              | 4,193,932          | 46      | 71.3    | 3,513 |
| 2   | M1R5S18 <sup>T</sup> | 14.94                            | 149                          | 2.24                            | 99.95            | 1.16              | 3,898,385          | 29      | 71.3    | 3,315 |
| 3   | M1R5S59 <sup>T</sup> | 12.30                            | 149                          | 1.84                            | 99.95            | 1.03              | 3,959,197          | 20      | 70.6    | 3,356 |
