# Supplementary material
Source: publisher figshare collection journal article supplement (https://microbiology.figshare.com/articles/dataset/_/24570964)
Supplement: Supplementary file 5 [file 1]

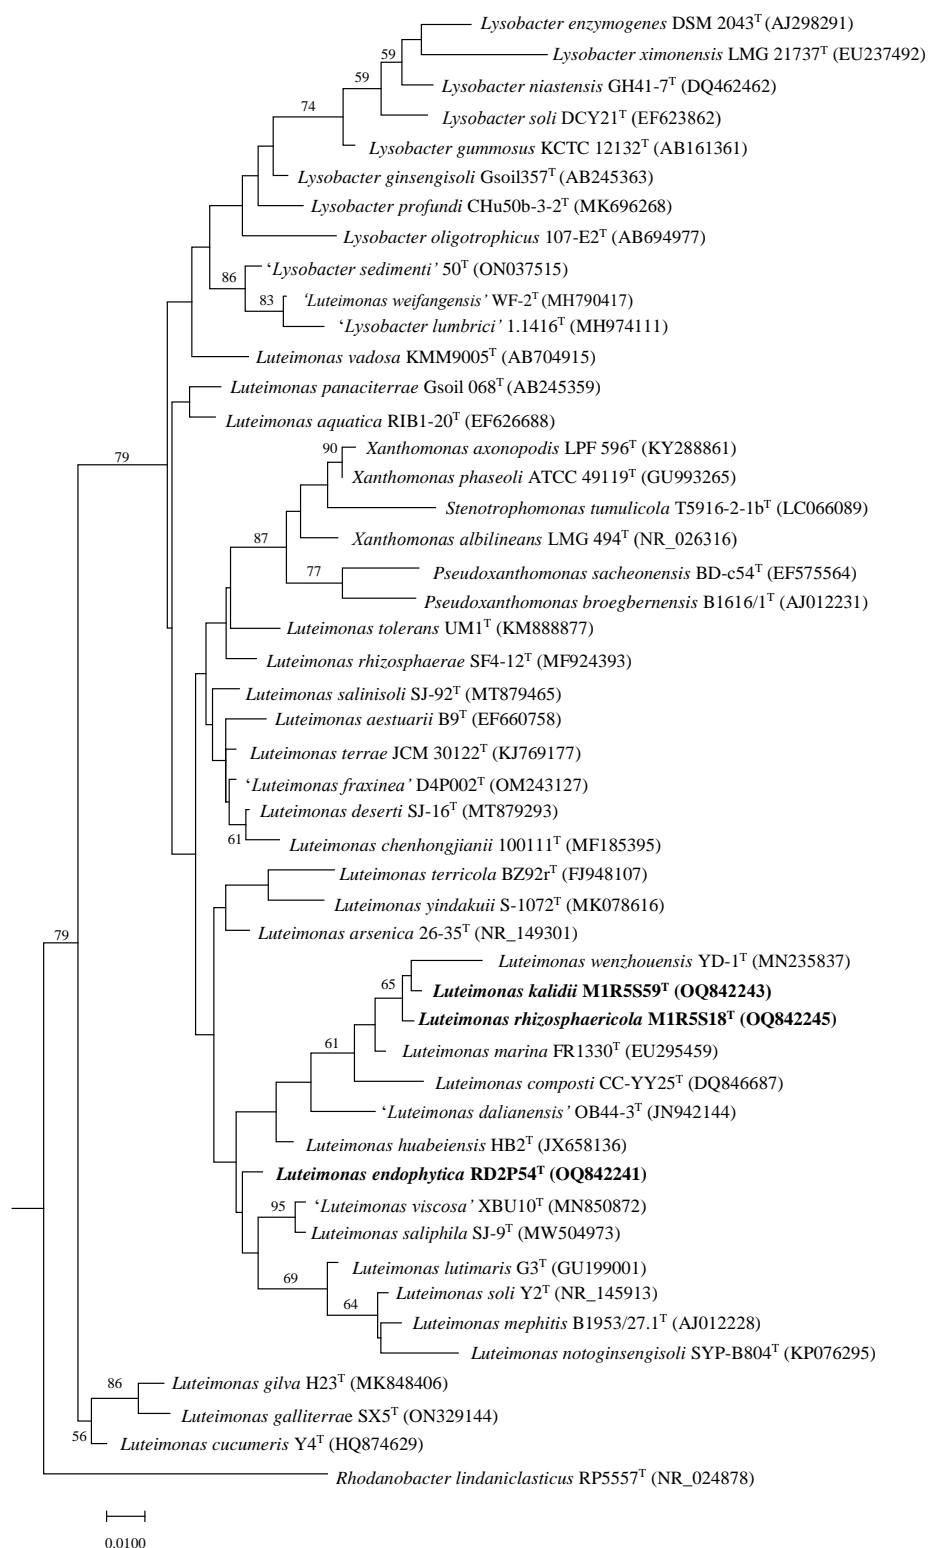

**Fig. S2** Phylogenetic tree reconstructed by the maximum-likelihood (ML) method based on 16S rRNA gene sequences. Bootstrap values >50% are shown at branch points. Bar, 0.01 substitutions per nucleotide position.
