# Supplementary material
Source: publisher figshare collection journal article supplement (https://microbiology.figshare.com/articles/dataset/_/24570964)
Supplement: Supplementary file 6 [file 1]

Archive with 9 entries (9 files):
- Table S1.pdf
- Table S2.pdf
- Table S3.pdf
- Table S4.pdf
- Fig. S1.pdf
- Fig. S2.pdf
- Fig. S3.pdf
- Fig. S4.pdf
- Fig. S5.pdf
