# Supplementary material
Source: publisher figshare collection journal article supplement (https://microbiology.figshare.com/articles/dataset/_/24570964)
Supplement: Supplementary file 6 [file 1 › Fig. S3.pdf]

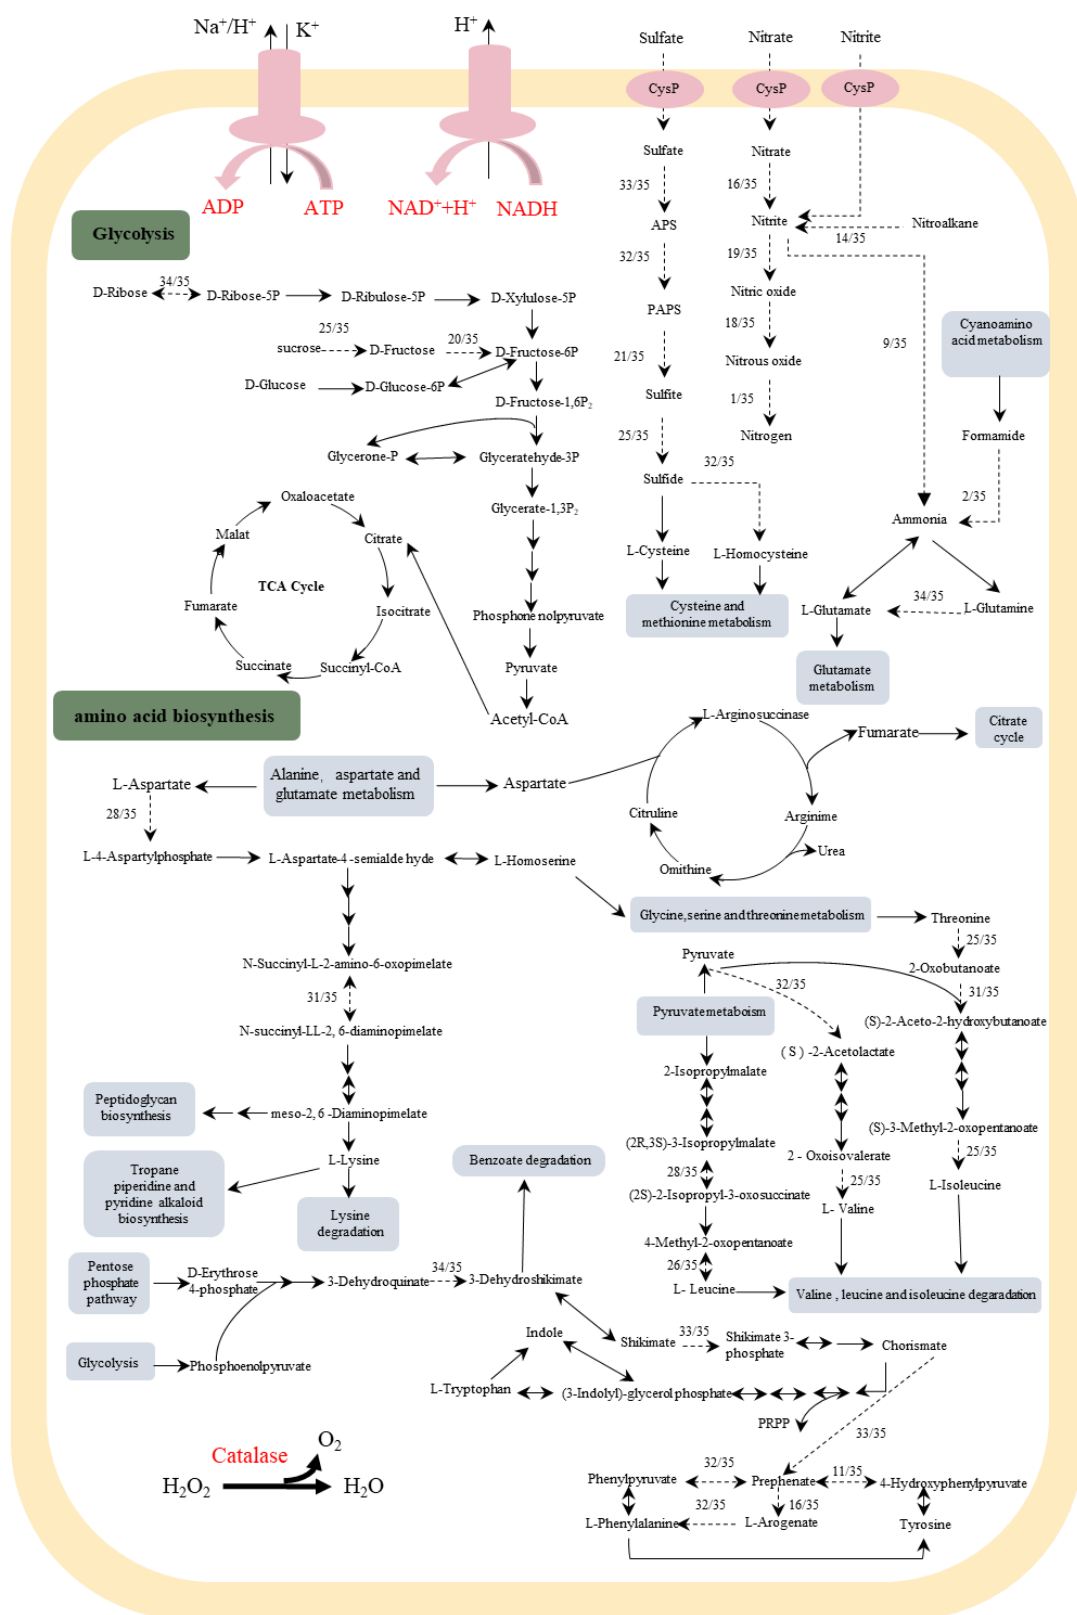

**Fig. S3** Prediction of the main metabolism pathways of RD2P54<sup>T</sup>, M1R5S18<sup>T</sup> and M1R5S59<sup>T</sup>. Solid lines indicate pathways common to all three strains, and dashed lines indicate partial presence.
