# Supplementary material
Source: publisher figshare collection journal article supplement (https://microbiology.figshare.com/articles/dataset/_/24570964)
Supplement: Supplementary file 6 [file 1 › Table S2.pdf]

**Table S2** Genome fundamental features of strains RD2P54<sup>T</sup>, M1R5S18<sup>T</sup>, and M1R5S59<sup>T</sup> and their relatives

| No. | Strains                                        | Accession number | Genome size (bp) | Number of contigs | DNA G+C content (%) | Number of CDS | rRNAs | tRNAs |
|-----|------------------------------------------------|------------------|------------------|-------------------|---------------------|---------------|-------|-------|
| 1   | RD2P54 <sup>T</sup>                            | JARXRM01         | 4,193,932        | 46                | 71.3                | 3,513         | 3     | 47    |
| 2   | M1R5S18 <sup>T</sup>                           | JARXRN01         | 3,898,385        | 29                | 71.3                | 3,315         | 3     | 48    |
| 3   | M1R5S59 <sup>T</sup>                           | JARXRO01         | 3,959,197        | 20                | 70.6                | 3,356         | 3     | 46    |
| 4   | <i>L. saliphila</i> SJ-9 <sup>T</sup>          | JAETWA01         | 4,647,522        | 48                | 69.3                | 4,178         | 6     | 53    |
| 5   | ' <i>L. viscosa</i> ' XBU10 <sup>T</sup>       | VTFT01           | 4,169,055        | 9                 | 69.9                | 3,626         | 3     | 51    |
| 6   | <i>L. wenzhouensis</i> YD-1 <sup>T</sup>       | VOHE01           | 3,443,522        | 20                | 71.8                | 3,032         | 3     | 49    |
| 7   | <i>L. marina</i> FR1330 <sup>T</sup>           | VOHK01           | 3,910,508        | 21                | 69.3                | 3,433         | 3     | 54    |
| 8   | <i>L. composti</i> DSM 19790 <sup>T</sup>      | JARYGX01         | 3,708,029        | 32                | 70.7                | 3,356         | 12    | 55    |
| 9   | <i>L. salinisoli</i> SJ-92 <sup>T</sup>        | JACCKA01         | 4,295,921        | 86                | 70.4                | 3,926         | 3     | 49    |
| 10  | <i>L. aquatica</i> RIB1-20 <sup>T</sup>        | JALBFU01         | 3,825,884        | 52                | 69.8                | 3,393         | 3     | 47    |
| 11  | <i>L. huabeiensis</i> HB2 <sup>T</sup>         | JAAN01           | 4,295,921        | 86                | 71.6                | 3,850         | 3     | 59    |
| 12  | <i>L. aestuarii</i> B9 <sup>T</sup>            | SMTF01           | 3,727,962        | 37                | 67.6                | 3,400         | 3     | 51    |
| 13  | <i>L. terrae</i> JCM 30122 <sup>T</sup>        | SMTG01           | 3,569,262        | 15                | 68.5                | 3,221         | 4     | 52    |
| 14  | <i>L. deserti</i> SJ-16 <sup>T</sup>           | JACCJZ01         | 3,726,879        | 20                | 69.3                | 3,290         | 12    | 62    |
| 15  | <i>L. abyssi</i> XH031 <sup>T</sup>            | JUKH01           | 3,980,899        | 36                | 69.3                | 3,446         | 6     | 56    |
| 16  | <i>L. arsenica</i> 26-35 <sup>T</sup>          | SJRW01           | 2,965,592        | 7                 | 70.2                | 2,728         | 3     | 48    |
| 17  | <i>L. cucumeris</i> CGMCC 1.10821 <sup>T</sup> | VLKN01           | 3,552,091        | 26                | 66.1                | 3,246         | 3     | 49    |
| 18  | <i>L. gilva</i> H23 <sup>T</sup>               | SZUA01           | 3,632,536        | 4                 | 65.9                | 3,366         | 3     | 45    |
| 19  | <i>L. rhizosphaerae</i> 4-12 <sup>T</sup>      | NRQR01           | 3,643,456        | 34                | 69.6                | 3,379         | 3     | 54    |

|    |                                          |          |           |    |      |       |   |    |
|----|------------------------------------------|----------|-----------|----|------|-------|---|----|
| 20 | <i>'L. fraxinea'</i> D4P002 <sup>T</sup> | CP089507 | 4,008,283 | 1  | 66.8 | 3,626 | 6 | 55 |
| 21 | <i>L. galliterrae</i> SX5 <sup>T</sup>   | JAMBEP01 | 3,599,217 | 11 | 65.7 | 3,223 | 3 | 49 |
| 22 | <i>L.mephitis</i> DSM 12574 <sup>T</sup> | AULN01   | 3,415,856 | 20 | 68.5 | 3,064 | 3 | 50 |
| 23 | <i>L.padinae</i> KCTC 52403 <sup>T</sup> | BMZT01   | 3,117,387 | 35 | 70.4 | 2,846 | 2 | 50 |
| 24 | <i>L. terricola</i> BZ92 <sup>rT</sup>   | SJRX01   | 3,039,636 | 20 | 69.3 | 2,813 | 3 | 49 |
