# Supplementary material
Source: publisher figshare collection journal article supplement (https://microbiology.figshare.com/articles/dataset/_/24570964)
Supplement: Supplementary file 6 [file 1 › Table S3.pdf]

**Table S3** Antibiotic sensitivity test of strains RD2P54<sup>T</sup>, M1R5S18<sup>T</sup>, and M1R5S59<sup>T</sup>

S, sensitive; R, resistant.

| <b>Antibiotics</b>                        | <b>RD2P54<sup>T</sup></b> | <b>M1R5S18<sup>T</sup></b> | <b>M1R5S59<sup>T</sup></b> |
|-------------------------------------------|---------------------------|----------------------------|----------------------------|
| Penicillin (10 U)                         | R                         | R                          | R                          |
| Oxacillin (1 µg)                          | R                         | R                          | R                          |
| Ampicillin (10 µg)                        | R                         | R                          | R                          |
| Carbenicillin (100 µg)                    | R                         | R                          | R                          |
| Piperacillin (100 µg)                     | S                         | R                          | R                          |
| Cephalexin (30 µg)                        | R                         | R                          | R                          |
| Cefazolin (30 µg)                         | R                         | R                          | R                          |
| Cefradine (30 µg)                         | R                         | R                          | R                          |
| Cefuroxime (30 µg)                        | S                         | S                          | R                          |
| Ceftazidime (30 µg)                       | S                         | R                          | S                          |
| Ceftriaxone (30 µg)                       | S                         | S                          | S                          |
| Cefoperazone (75 µg)                      | S                         | R                          | R                          |
| Amikacin (30 µg)                          | S                         | R                          | S                          |
| Gentamicin (10 µg)                        | R                         | R                          | S                          |
| Kanamycin (30 µg)                         | S                         | R                          | S                          |
| Neomycin (30 µg)                          | S                         | S                          | S                          |
| Tetracycline (30 µg)                      | S                         | S                          | S                          |
| Doxycycline (30 µg)                       | S                         | S                          | S                          |
| Minocycline (30 µg)                       | S                         | S                          | S                          |
| Erythrocin (15 µg)                        | S                         | S                          | S                          |
| Medermycin (30 µg)                        | S                         | R                          | S                          |
| Norfloxacin (10 µg)                       | S                         | S                          | S                          |
| Ofloxacin (5 µg)                          | S                         | S                          | S                          |
| Ciprofloxacin (5 µg)                      | S                         | S                          | S                          |
| Vancomycin (30 µg)                        | S                         | S                          | S                          |
| Polymyxin B (300 IU)                      | S                         | S                          | S                          |
| Compound Sulfamethoxazole (23.75/1.25 µg) | R                         | R                          | S                          |
| Furazolidone (300 µg)                     | R                         | R                          | R                          |
| Chloramphenicol (30 µg)                   | S                         | S                          | S                          |
| Clindamycin (2 µg)                        | R                         | R                          | R                          |
