# Supplementary material
Source: publisher figshare collection journal article supplement (https://microbiology.figshare.com/articles/dataset/_/24570964)
Supplement: Supplementary file 6 [file 1 › Table S4.pdf]

**Table S4** Fatty acids compositions (percentages) of RD2P54<sup>T</sup>, M1R5S18<sup>T</sup> and M1R5S59<sup>T</sup> and their reference strains

**Strains:** **1**, strain RD2P54<sup>T</sup>; **2**, strain M1R5S18<sup>T</sup>; **3**, strain M1R5S59<sup>T</sup>; **4**, *L. saliphila* SJ-9<sup>T</sup>; **5**, '*L. viscosa*' CGMCC 1.12158<sup>T</sup>; **6**, *L. wenzhouensis* YD-1<sup>T</sup>; **7**, *L. marina* KCTC 12327<sup>T</sup>; **8**, *L. composti* DSM 19790<sup>T</sup>; **8**, *L. salinisoli* SJ-92<sup>T</sup>. All data are from this study. tr, Traces (<1 %); –, not detected.

| Fatty acids                           | 1           | 2           | 3           | 4           | 5           | 6           | 7           | 8           | 9           |
|---------------------------------------|-------------|-------------|-------------|-------------|-------------|-------------|-------------|-------------|-------------|
| iso-C <sub>11:0</sub>                 | 4.1         | 6.1         | 5.2         | 5.6         | 5.4         | 5.2         | 7.1         | 5.9         | 9.0         |
| iso-C <sub>11:0</sub> 3OH             | -           | 9.2         | <b>10.5</b> | 5.2         | -           | 8.9         | 6.2         | 4.9         | 4.0         |
| iso-C <sub>14:1</sub> E               | -           | -           | -           | TR          | TR          | -           | 1.2         | TR          | TR          |
| C <sub>12:0</sub>                     | 1.8         | TR          | -           |
| iso-C <sub>14:0</sub>                 | 1.7         | TR          | TR          | TR          | TR          | TR          | TR          | 1.9         | 1.0         |
| C <sub>14:0</sub>                     | 1.3         | TR          |
| iso-C <sub>13:0</sub> 3OH             | 2.2         | TR          | -           | TR          | -           | TR          | TR          | TR          | 3.4         |
| iso-C <sub>15:1</sub> F               | 2.0         | 1.3         | 1.2         | 1.1         | TR          | 1.4         | 1.1         | 1.4         | 2.5         |
| iso-C <sub>15:0</sub>                 | <b>28.4</b> | <b>21.4</b> | <b>25.1</b> | <b>17.3</b> | <b>31.1</b> | <b>24.7</b> | <b>15.9</b> | <b>13.9</b> | <b>18.0</b> |
| anteiso-C <sub>15:0</sub>             | 3.4         | 2.5         | 2.5         | 1.3         | 1.2         | 1.9         | 4.2         | 2.3         | 2.8         |
| C <sub>15:1</sub> <i>ω</i> 5 <i>c</i> | TR          | TR          | TR          | 5.1         | TR          | TR          | 5.0         | 3.5         | 9.5         |
| iso-C <sub>16:0</sub>                 | 3.9         | 4.5         | 5.0         | 8.3         | 2.4         | 4.9         | 2.1         | <b>12.4</b> | 3.0         |
| C <sub>16:1</sub> <i>ω</i> 5 <i>c</i> | TR          | TR          | TR          | 1.3         | TR          | TR          | 1.2         | 2.4         | 1.7         |
| C <sub>16:0</sub>                     | 4.0         | 2.6         | 3.1         | 7.2         | 7.8         | 6.5         | 6.4         | 2.9         | 1.3         |
| iso-C <sub>15:0</sub> 3OH             | TR          | TR          | TR          | TR          | -           | 1.2         | TR          | 1.1         | 1.1         |
| iso-C <sub>17:0</sub>                 | 5.0         | <b>10.3</b> | 9.9         | 3.5         | 7.9         | 7.9         | 7.0         | 3.1         | 2.8         |
| C <sub>18:1</sub> <i>ω</i> 9 <i>c</i> | -           | TR          | TR          | TR          | TR          | 1.1         | TR          | TR          | TR          |

|                   |             |             |             |             |             |             |             |             |             |
|-------------------|-------------|-------------|-------------|-------------|-------------|-------------|-------------|-------------|-------------|
| C <sub>18:0</sub> | -           | -           | -           | TR          | 4.7         | 3.0         | 1.4         | TR          | TR          |
| Summed Feature 1  | 1.1         | TR          |
| Summed Feature 3  | 4.7         | 3.1         | 3.1         | 4.3         | 3.2         | 2.2         | 3.7         | 7.3         | 2.3         |
| Summed Feature 8  | 4.9         | TR          |
| Summed Feature 9  | <b>14.3</b> | <b>28.9</b> | <b>24.9</b> | <b>29.4</b> | <b>22.5</b> | <b>20.6</b> | <b>29.7</b> | <b>28.9</b> | <b>24.2</b> |

Summed feature 1 consists of iso-C<sub>15:1</sub> H and/or C<sub>13:0</sub> 3OH, Summed feature 3 consists of C<sub>16:1</sub> *ω*7*c* and/or C<sub>16:1</sub> *ω*6*c*, Summed feature 8 consists of C<sub>18:1</sub> *ω*7*c* and/or C<sub>18:1</sub> *ω*6*c*, Summed Feature 9 consists of C<sub>16:0</sub> 10-methyl and/or iso-C<sub>17:1</sub> *ω*9*c*.
